# Supplementary material
Source: HighWire-hosted journal article supplement (https://sti.bmj.com/content/95/2/95)
Supplement: inline-supplementary-material-1 [file inline-supplementary-material-1.docx]

Antiretrovirale Therapie verhindert rektales Shedding von HIV-RNA in MSM mit rektalen *C. trachomatis-* und *N. gonorrhoeae-*Infektionen trotz Entzündungsreaktion – eine monozentrische Querschnittsstudie

ZUSAMMENFASSUNG

**Zielsetzung** Rektale Infektionen mit *Chlamydia trachomatis* und/oder *Neisseria gonorrhoeae* (CT/NG) sind bei Männern, die Sex mit Männern haben (MSM) verbreitet und werden mit der Übertragung von HIV in Verbindung gebracht. Jedoch verlaufen rektale CT/NG-Infektionen oft asymptomatisch und es ist nicht bekannt, wie sie die Übertragung von HIV begünstigen. Wir haben klinische und zytologische Entzündungsparameter sowie rektale HIV-RNA in HIV-infizierten MSM mit und ohne CT/NG-Infektionen untersucht.

**Methoden** 112 HIV-positive MSM mit oder ohne rektale Symptome und mit oder ohne antiretrovirale Therapie (ART), die sich zwischen November 2013 und Februar 2014 einer hochauflösenden Anoskopie (HRA) in unserer proktologischen Ambulanz der Universitätsklinik Essen (Deutschland) unterzogen, wurden in die Querschnittstudie eingeschlossen. Während der Untersuchung wurden rektale Abstriche zu Untersuchung auf CT/NG-Infektionen, HIV-RNA sowie Entzündungszellen (Granulozyten, Lymphozyten, Histiozyten) gesammelt. Daten von 110 Patienten konnten entsprechend des Studienprotokolls ausgewertet werden. Fehlende Daten wurden nicht imputiert.

**Ergebnisse**  17 Patienten hatten eine CT- oder NG-Infektion, 4 Patienten hatten eine Koinfektion mit beiden Erregern. Nur symptomatische CT/NG-Infektionen (8/17) zeigten Entzündungszeichen in der HRA. Symptomatische CT/NG-Infektionen waren zudem mit dem Nachweis von Lymphozyten und Histiozyten in der rektalen Zytologie assoziiert (jeweils p<0,001). Asymptomatische CT/NG-Infektionen waren hingegen weder mit klinischen noch zytologischen Entzündungsanzeichen assoziiert. Bei keinem der Patienten unter kombinierter antiretroviraler Therapie (cART) konnte bei rektaler CT/NG-Infektion rektale HIV-RNA nachgewiesen werden, wenn HIV-RNA Level im Plasma unter der Detektionsgrenze waren (n=13). Neben CT/NG-Infektionen wurden häufig Syphilis (n=4) und HPV-assoziierte Läsionen (n=37) nachgewiesen. Die gleichzeitige Infektion mit ≥2 sexuell übertragbaren Erkrankungen war mit proktologischen Symptomen assoziiert.

**Schlussfolgerung**  Nur symptomatische aber nicht asymptomatische rektale Infektionen mit CT und/oder NG waren mit klinischen und zytologischen Entzündungszeichen assoziiert. Unter Behandlung mit ART wird das rektale Shedding von HIV in Patienten, bei denen HIV-RNA im Plasma unter der Nachweisgrenze ist, nicht durch CT/NG-Infektionen gefördert.
